# Supplementary material for: Systemic Oxidative Balance Reflects the Liver Disease Progression Status for Primary Biliary Cholangitis (Pbc): The Narcissus Fountain
Source: MDPI journal article supplement (doi:10.3390/antiox13040387), 2024-03-23
Supplement: s1 [file s1]

## Supplementary File S1.

### EVALUATION OF LIFESTYLE HABITS

#### Physical exercise assessment:

Medical validated questionnaire and relative items assessing physical exercise practicing in enrolled patients.

| Questions/Items                                                                                    | Answer                           |                               |
|----------------------------------------------------------------------------------------------------|----------------------------------|-------------------------------|
| Are you doing or have you ever done (in the last 2 years) sport in a continuative and regular way? | YES                              | NO                            |
| Have you changed your daily physical activity in the last 3 months?                                | NO                               | YES                           |
| If yes, has it enhanced or worsened?                                                               | Enhanced                         | Worsened                      |
| How many <u>hours per week</u> do you usually spend for physical exercise?                         | More than<br>150<br>minutes/week | Less than 150<br>minutes/week |

Each patient was considered on **active** physical exercise if he/she has done sports in the last 2 years, this practice has not worsened in the last 3 months by spending at least 150 minutes per week in physical activity.

**Supplementary Table S1.** Nutritional assessment in study population groups relative to the period of 3-month controlled regimen diet

| Variables                                                                    |  | Healthy<br>(n:10) | PBC<br>(n:41)     | MASLD<br>(n:40)   | CHB<br>(n:52)     | CHC<br>(n:50)     | <i>p</i> -value of the<br>comparison between<br>the CLDs etiologies                |
|------------------------------------------------------------------------------|--|-------------------|-------------------|-------------------|-------------------|-------------------|------------------------------------------------------------------------------------|
| Physical activity<br>(hours/week in the last<br>3 months)<br>(mean $\pm$ SD) |  | 6.3 $\pm$ 1.5     | 6.1 $\pm$ 1.3     | 6.1 $\pm$ 1.2     | 5.8 $\pm$ 1.3     | 5.9 $\pm$ 1.4     | PBC vs Healthy: n.s.<br>PBC vs MASLD: n.s.<br>PBC vs CHB: n.s.<br>PBC vs CHC: n.s. |
| Patients (%) on “active<br>physical exercise”                                |  | 75.1              | 78.2              | 71.9              | 74.5              | 73.8              | PBC vs Healthy: n.s.<br>PBC vs MASLD: n.s.<br>PBC vs CHB: n.s.<br>PBC vs CHC: n.s. |
| Daily intake<br>(Kilocalories / day)                                         |  | 2305 $\pm$ 817.4  | 2307 $\pm$ 411.5  | 2307 $\pm$ 408.7  | 2305 $\pm$ 410.2  | 2306 $\pm$ 521.3  | PBC vs Healthy: n.s.<br>PBC vs MASLD: n.s.<br>PBC vs CHB: n.s.<br>PBC vs CHC: n.s. |
| Carbohydrates<br>(Kilocalories)                                              |  | 1072 $\pm$ 241.4  | 1073 $\pm$ 233.1  | 1075 $\pm$ 230.3  | 1071 $\pm$ 243.2  | 1078 $\pm$ 417.6  | PBC vs Healthy: n.s.<br>PBC vs MASLD: n.s.<br>PBC vs CHB: n.s.<br>PBC vs CHC: n.s. |
| Lipids<br>(Kilocalories)                                                     |  | 579.3 $\pm$ 242.1 | 572.3 $\pm$ 131.2 | 580.9 $\pm$ 131.4 | 577.2 $\pm$ 238.3 | 574 $\pm$ 248.9   | PBC vs Healthy: n.s.<br>PBC vs MASLD: n.s.<br>PBC vs CHB: n.s.<br>PBC vs CHC: n.s. |
| Proteins<br>(Kilocalories)                                                   |  | 658.4 $\pm$ 202.3 | 662.2 $\pm$ 196.8 | 658.7 $\pm$ 199.6 | 659.3 $\pm$ 201.6 | 666.7 $\pm$ 162.4 | PBC vs Healthy: n.s.<br>PBC vs MASLD: n.s.<br>PBC vs CHB: n.s.<br>PBC vs CHC: n.s. |

PBC: Primary Biliary Cholangitis; CHB: Chronic HBV infection; CHC: Chronic HCV infection; MASLD: Metabolic dysfunction associated steatotic liver disease; SD: standard deviation. In the case of non-normal or normal distribution, the Kruskal-Wallis test or ANOVA test with post-hoc Tukey analysis, respectively, were performed to compare the continuous variables among different CLDs etiologies. Statistically significant differences ( $p < 0.05$ ) are reported in bold.
